# Supplementary material for: lncRNA UCA1 Mediates Resistance to Cisplatin by Regulating the miR-143/FOSL2-Signaling Pathway in Ovarian Cancer
Source: PubMed Central journal article supplement — Mol Ther Nucleic Acids. 2019 May 24;17:92–101. doi: 10.1016/j.omtn.2019.05.007 (PMC6595407; doi:10.1016/j.omtn.2019.05.007), 2019-05-24

OMTN, Volume 17

## **Supplemental Information**

### **lncRNA UCA1 Mediates Resistance to Cisplatin by Regulating the miR-143/FOSL2-Signaling Pathway in Ovarian Cancer**

**Zewu Li, Huanfu Niu, Qianqian Qin, Sanhui Yang, Qin Wang, Chunna Yu, Zefeng Wei, Zhenzhen Jin, Xuenan Wang, Aijun Yang, and Xiaoli Chen**

**Figure S1** (A) qRT-PCR analysis of UCA1 in A2780-DDP cells transfected with UCA1 siRNAs for 48h; (B) qRT-PCR analysis of UCA1 in SKOV-3-DDP cells transfected with UCA1 siRNAs for 48h; (C) qRT-PCR analysis of UCA1 in A2780 cells transfected with pcDNA-Control or pcDNA-UCA1 for 48h; (D) qRT-PCR analysis of UCA1 in SKOV-3 cells transfected with pcDNA-Control or pcDNA-UCA1 for 48h; All tests were at least performed three times. Data were expressed as mean  $\pm$  SD. \*\*\*P < 0.001; \*\*P < 0.01

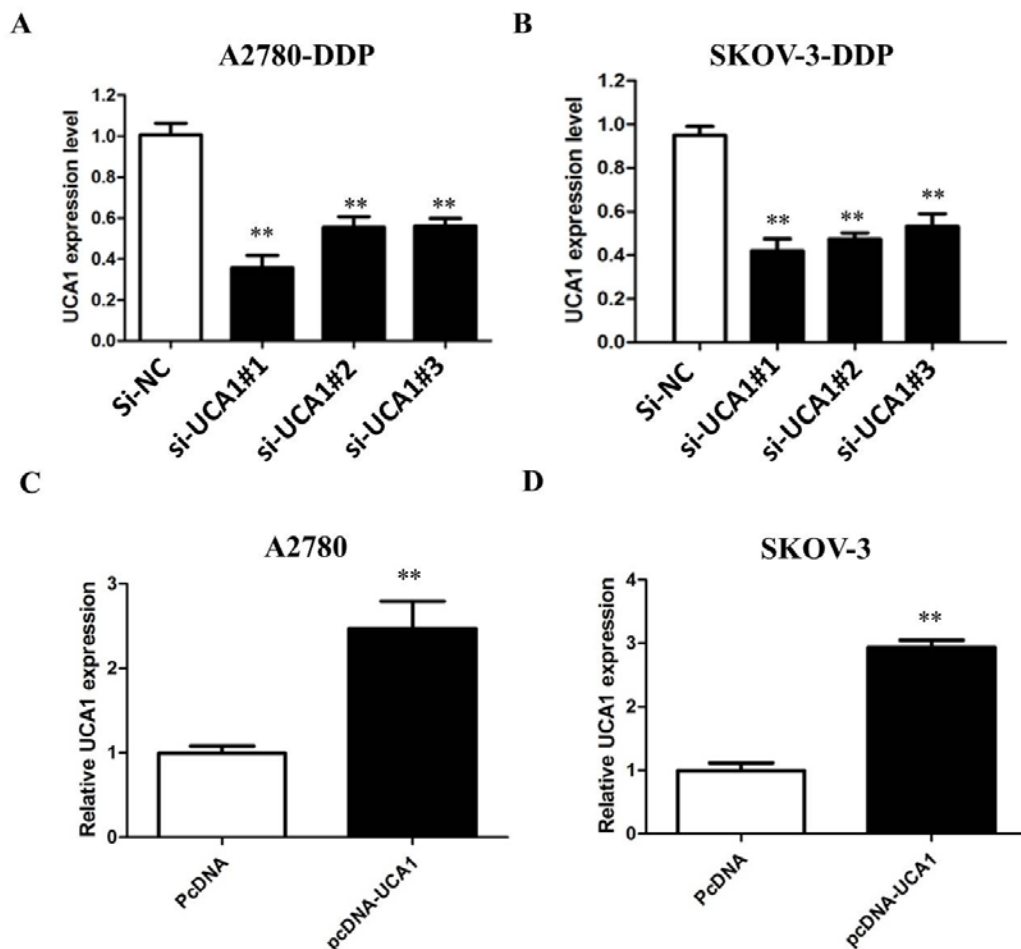

Supplement: mmc1.pdf [file mmc1.pdf]
